# Supplementary material for: Microfluidic thread based electroanalytical system for green chromatographic separations
Source: Royal Society of Chemistry journal article supplement (doi:10.1039/c7lc01267e), 2018-01-01
Supplement: c7lc01267e1.pdf [file c7lc01267e1.pdf]

**Electronic Supplementary Information (ESI)**

**Microfluidic thread based electroanalytical system for  
green chromatographic separations**

*Deonir Agustini<sup>a</sup>, Lucas Fedalto<sup>a</sup>, Márcio F. Bergamini<sup>a</sup>, Luiz Humberto Marcolino-  
Junior<sup>a\*</sup>*

*Laboratório de Sensores Eletroquímicos (LabSense), Departamento de Química,  
Universidade Federal do Paraná (UFPR), CEP 81.531-980, Curitiba-PR, Brazil.*

\*email address: [luiz1berto@ufpr.br](mailto:luiz1berto@ufpr.br)

Telephone number: +55 41 3361-3177

Fax number: +55 41 3361-3186

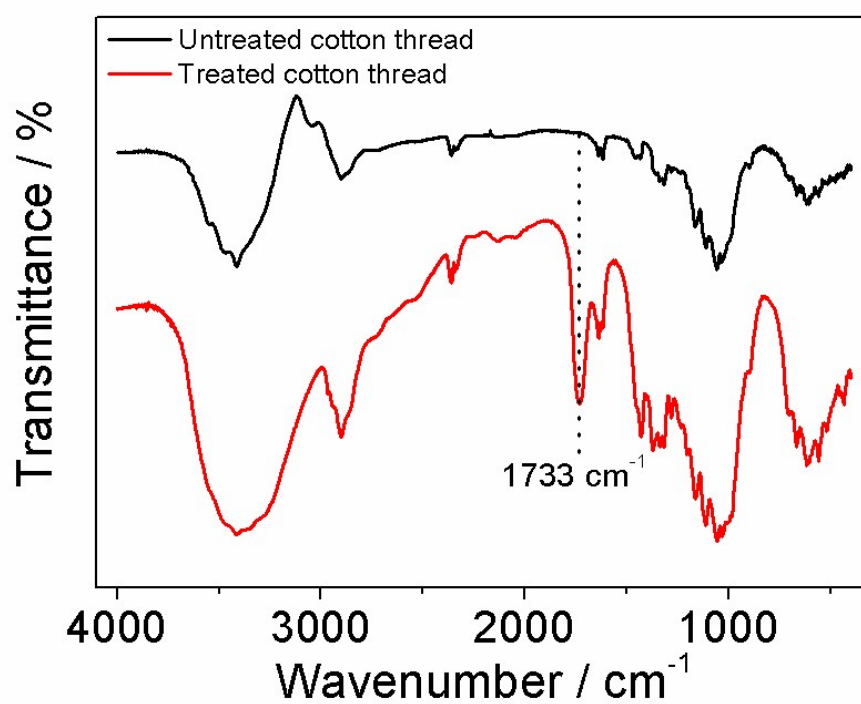

**Fig. S1** FTIR spectra of the untreated and treated cotton threads by the citric acid esterification process.

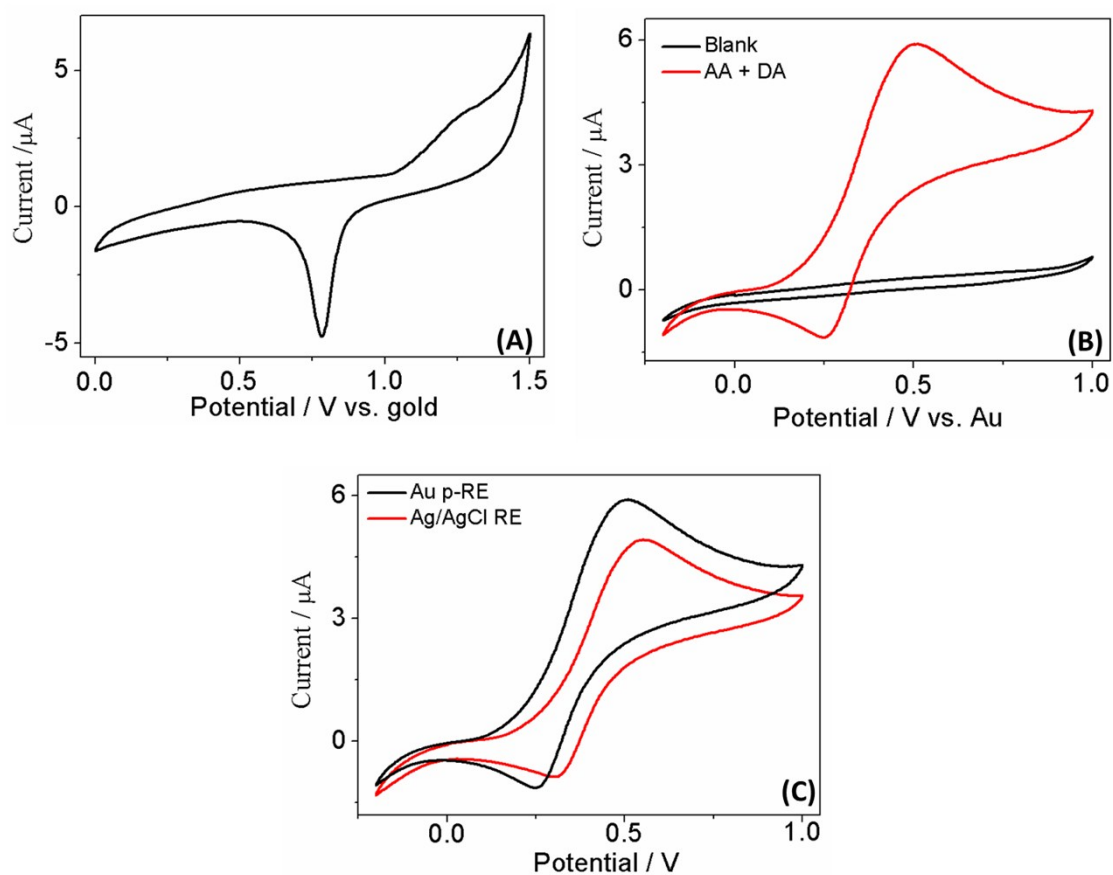

**Fig. S2** Typical CVs obtained with the gold electrodes of the proposed microfluidic system in (A) 0.5 M  $\text{H}_2\text{SO}_4$ , (B) 0.1 M acetate buffer pH 3.8 without (blank) and with 1.0 mM AA + 1.0 mM DA, and (C) 0.1 M acetate buffer pH 3.8 containing 1.0 mM AA + 1.0 mM DA employing the gold pseudo reference electrode and the Ag/AgCl reference electrode. Scan rate:  $50 \text{ mV s}^{-1}$ .

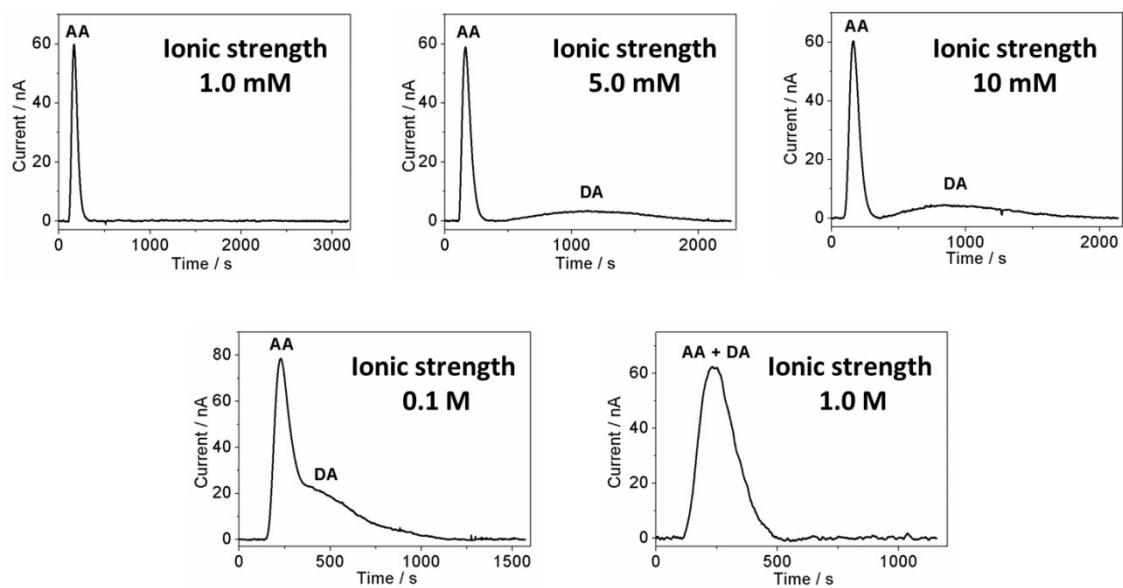

**Fig. S3** Effect of ionic strength on the chromatograms obtained with the proposed system for a solution containing 1.0 mM AA + 1.0 mM DA using isocratic elutions of acetate buffer pH 3.8 with ionic strengths between 1.0 mM – 1.0 M as mobile phase. Interval time: 100 ms; applied potential: 0.6 V; injected volume: 1.0  $\mu$ L.

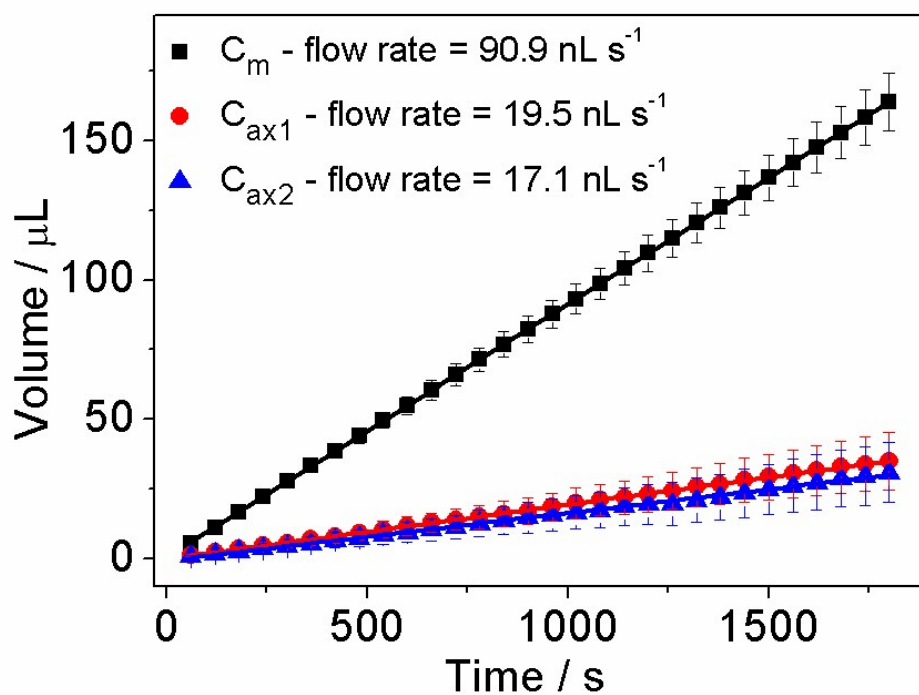

**Fig. S4** Relationship between the volume of solution transported in each of the three microchannels of the system ( $C_m$ ,  $C_{ax1}$  and  $C_{ax2}$ ) as a function of time, and the individual values of the flow rates obtained in the microchannels.

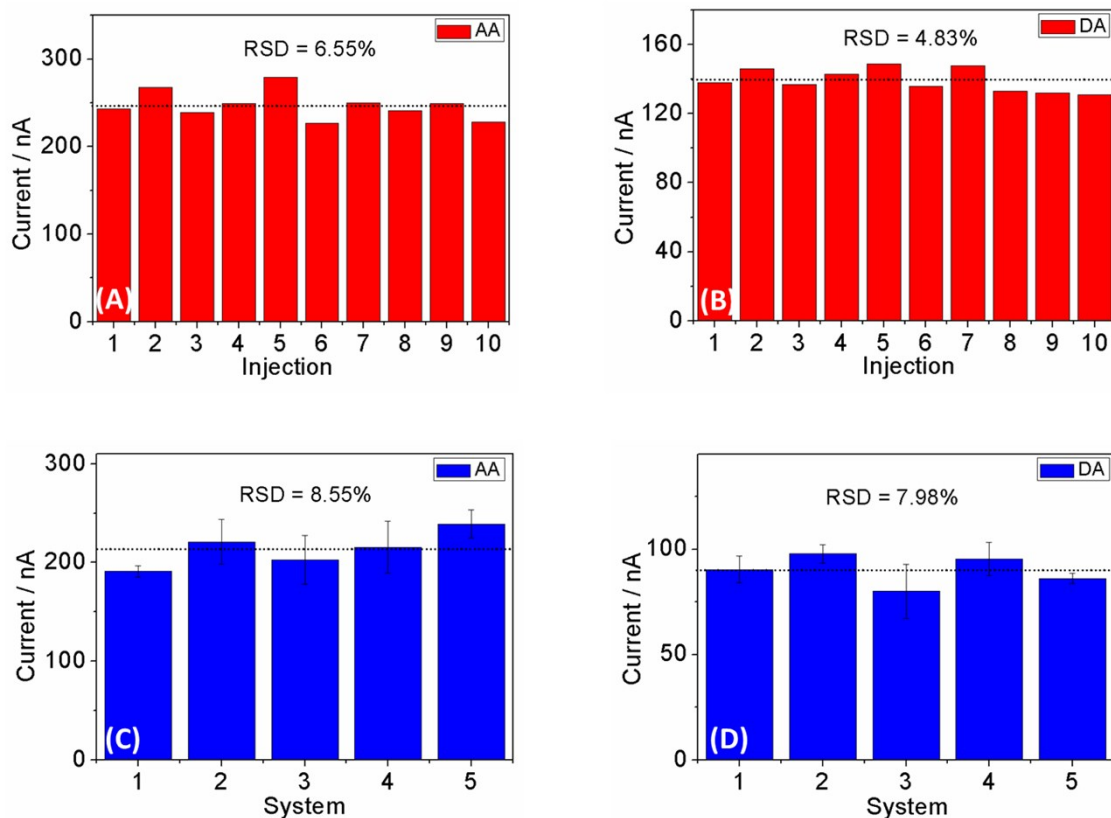

**Fig. S5** Current values and relative standard deviation (RSD) obtained in analyses of a mixture of 1.0 mM AA + 1.0 mM DA for (A-B) 10 consecutive injections and for (C-D) 5 different systems. Interval time: 100 ms; applied potential: 0.6 V; injected volume: 2.0  $\mu$ L.

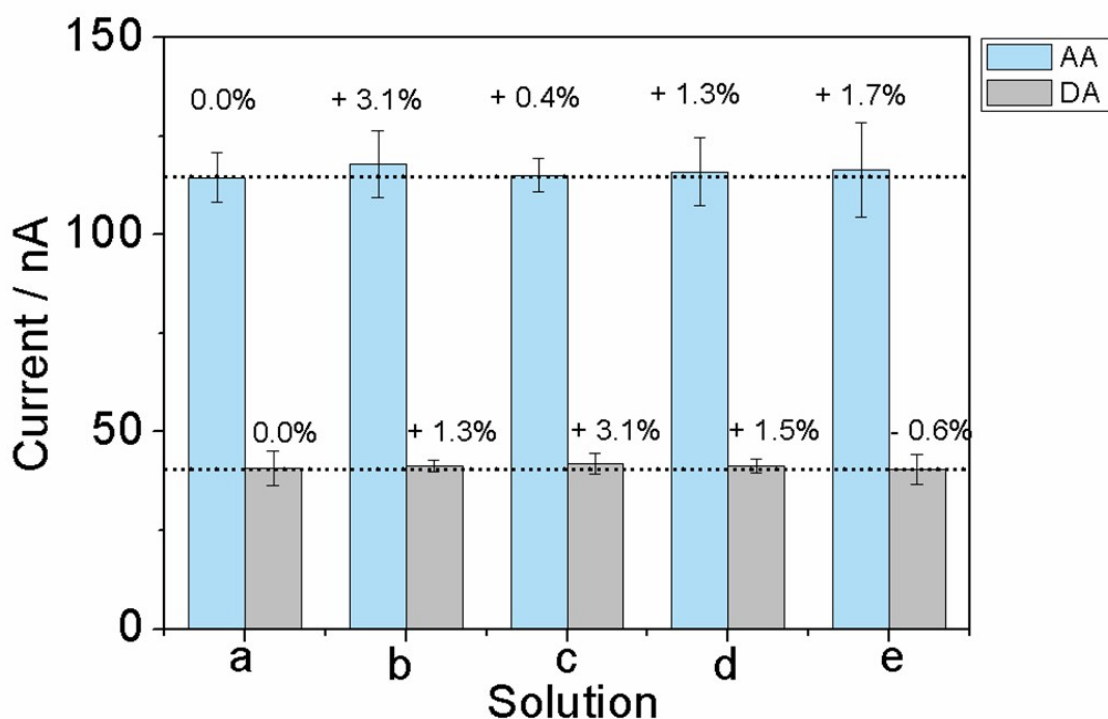

**Fig. S6** Variation in the responses obtained with the proposed system for the detection of AA and DA in solutions containing potentially interfering species present in the tear, with the following concentrations: (a) 0.5 mM AA + 0.5 mM DA; (b) 0.5 mM AA + 0.5 mM DA + 0.5 mM glucose; (c) 0.5 mM AA + 0.5 mM DA + 10.0 mM lactate; (d) 0.5 mM AA + 0.5 mM DA + 10.0 mM urea; (e) 0.5 mM AA + 0.5 mM DA + 0.5 mM glucose + 10.0 mM lactate + 10.0 mM urea. Interval time: 100 ms; applied potential: 0.6 V; injected volume: 2.0  $\mu$ L.
